# Supplementary material for: A hybrid solar cell fabricated using amorphous silicon and a fullerene derivative
Source: Royal Society of Chemistry journal article supplement (doi:10.1039/c3cp53493f), 2013-01-01
Supplement: c3cp53493f.pdf [file c3cp53493f.pdf]

## Supporting Information

### Hybrid Solar Cells Fabricated with Amorphous Silicon and Fullerene Derivative

**Myoung Hee Yun<sup>a</sup>, Ji Hoon Jang<sup>b</sup>, Kyung Min Kim<sup>b</sup>, Hee-eun Song<sup>b</sup>, Jeong Chul Lee<sup>\*b</sup>,  
Jin Young Kim<sup>\*a</sup>**

<sup>a</sup> *Interdisciplinary School of Green Energy, Ulsan National Institute of Science and Technology (UNIST) Banyeon-ri 81, Ulsan, 689-798, Korea. E-mail: jykim@unist.ac.kr; Fax: +82-52-217-2909; Tel: +82-52-217-2911*

<sup>b</sup> *Korea Institute of Energy Research (KIER), Jang-dong 71-2, Yuseong-gu, Daejeon, 305-343 Korea. E-mail: jclee@kier.re.kr*

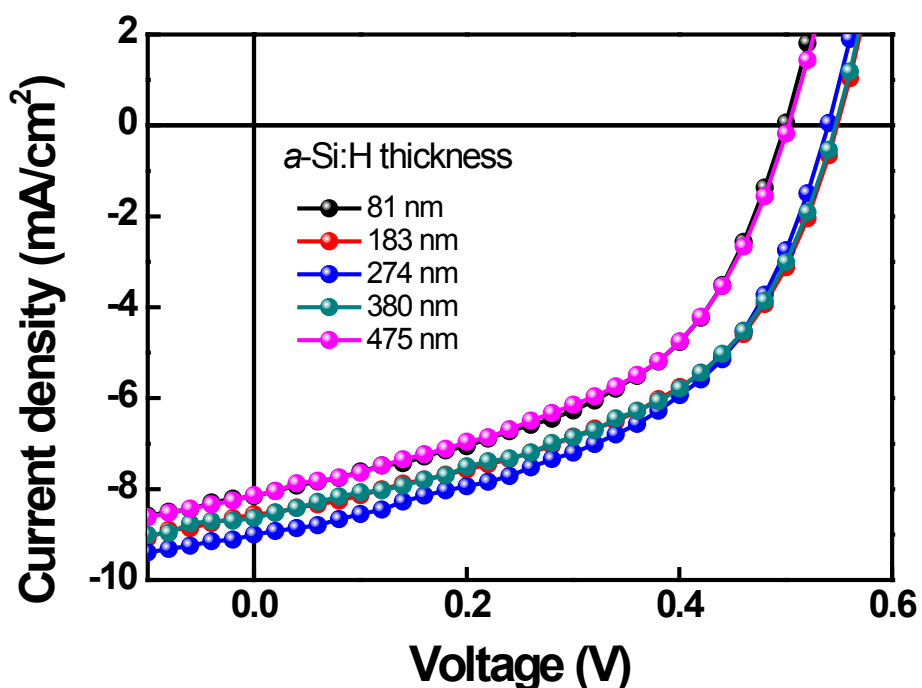

**Figure S1.** Current density–voltage ( $J$ – $V$ ) characteristics of the  $a$ -Si:H/[71]PCBM devices with different thickness 81–475 nm before thermal annealing at 150°C measured under AM1.5G illumination from a calibrated solar simulator with irradiation intensity of 100 mW/cm<sup>2</sup>.

**Table S1.** Photovoltaic parameters of the  $a$ -Si:H/[71]PCBM devices with different thickness before thermal annealing at 150°C

| $a$ -Si:H/[71]PCBM     | $a$ -Si:H thickness | $J_{sc}$ (mAcm <sup>-2</sup> ) | $V_{oc}$ (V) | $FF$ | Efficiency (%) |
|------------------------|---------------------|--------------------------------|--------------|------|----------------|
| No annealing treatment | 81 nm               | 8.16                           | 0.50         | 0.49 | 1.99           |
|                        | 183 nm              | 8.56                           | 0.55         | 0.49 | 2.31           |
|                        | 274 nm              | 9.11                           | 0.56         | 0.49 | 2.51           |
|                        | 380 nm              | 8.64                           | 0.55         | 0.49 | 2.32           |
|                        | 475 nm              | 8.14                           | 0.50         | 0.48 | 1.98           |

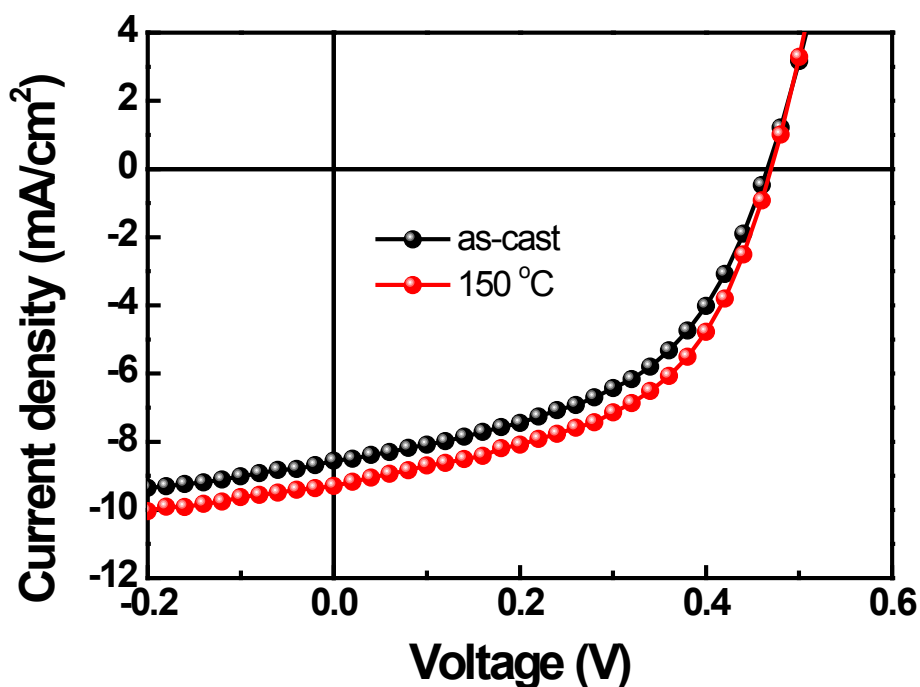

**Figure S2** Current density–voltage ( $J$ – $V$ ) characteristics of the  $a$ -Si:H/[71]PCBM devices with 274 nm of  $a$ -Si:H thickness and around 20 nm thickness of [71]PCBM measured under AM1.5G illumination from a calibrated solar simulator with irradiation intensity of  $100 \text{ mW cm}^{-2}$ .

**Table S2** Photovoltaic parameters of the  $a$ -Si:H/[71]PCBM devices with 274 nm thickness of  $a$ -Si:H of and around 20 nm of [71]PCBM before thermal annealing at  $150^\circ\text{C}$ .

| $a$ -Si:H/[71]PCBM | $a$ -Si:H thickness | Annealing treatment | $J_{\text{SC}}$ ( $\text{mA cm}^{-2}$ ) | $V_{\text{OC}}$ (V) | $FF$ | Efficiency (%) |
|--------------------|---------------------|---------------------|-----------------------------------------|---------------------|------|----------------|
|                    | 274 nm              | x                   | 8.53                                    | 0.50                | 0.48 | 2.03           |
|                    |                     | $150^\circ\text{C}$ | 9.08                                    | 0.52                | 0.50 | 2.35           |

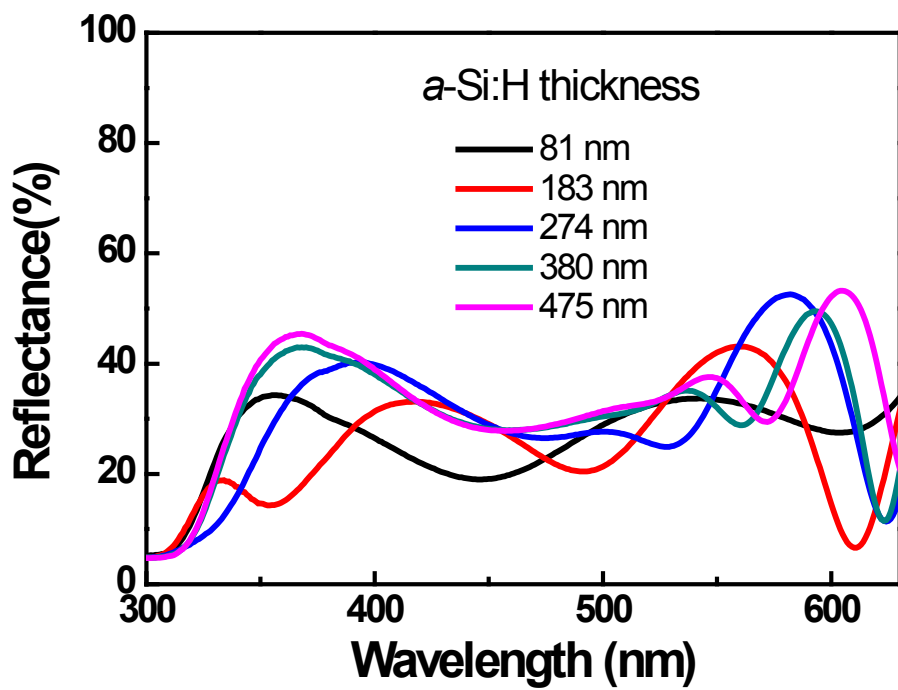

**Figure S3.** Comparing reflectance spectra of the solar cells with *a*-Si:H of different thickness.

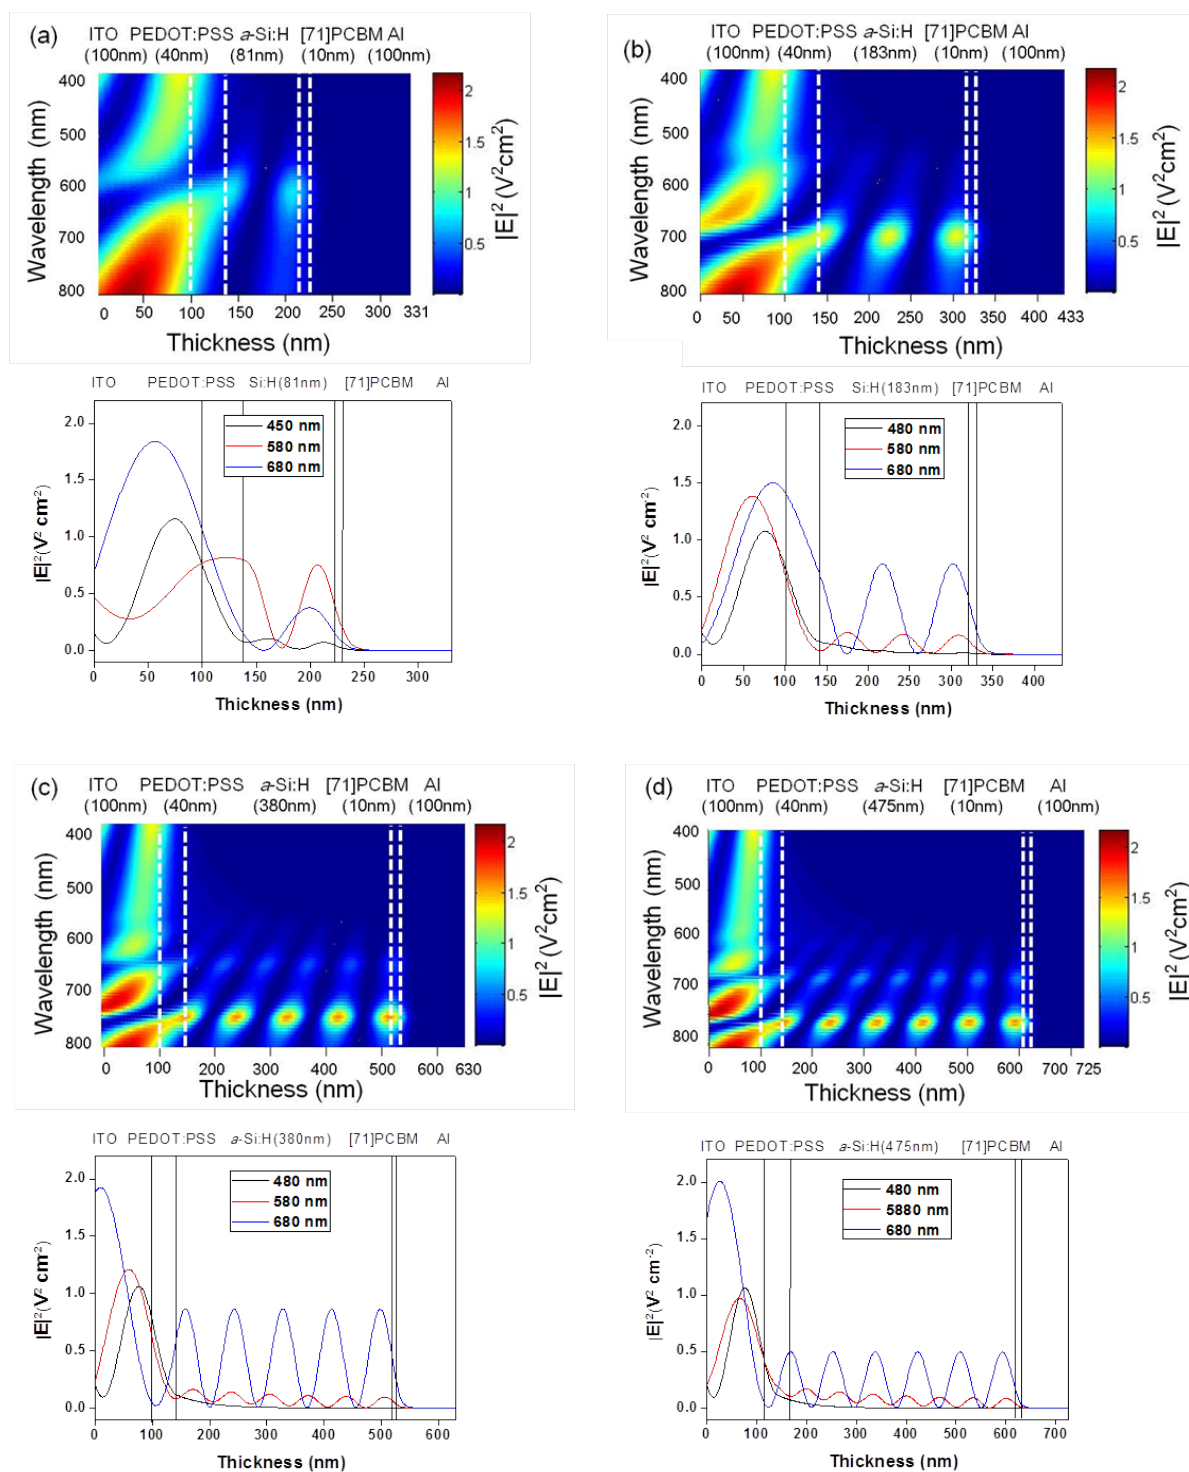

**Figure S4.** Mesh image and plot images of the model output for the device consisting of ITO/PEDOT:PSS/*a*-Si:H/[71]PCBM/Al with different thickness of *a*-Si:H. Modulus squared of electric field ( $V^2 cm^{-2}$ ). (a) 81 nm, (b) 183 nm, (c) 380 nm, and (d) 475 nm.

**Table S3.** Photovoltaic parameters of the *a*-Si:H/[71]PCBM devices with different p-layer.

| p-layer                       | Thickness | $J_{sc}$<br>(mA cm <sup>-2</sup> ) | $V_{oc}$<br>(V) | $FF$ | Efficiency<br>(%) |
|-------------------------------|-----------|------------------------------------|-----------------|------|-------------------|
| PEDOT:PSS                     | 20 nm     | 8.25                               | 0.36            | 0.45 | 1.34              |
| PEDOT:PSS                     | 10 nm     | 7.73                               | 0.37            | 0.42 | 1.20              |
| V <sub>2</sub> O <sub>5</sub> | 5 nm      | 9.46                               | 0.45            | 0.40 | 1.71              |
| MoO <sub>3</sub>              | 5 nm      | 5.50                               | 0.43            | 0.35 | 0.84              |

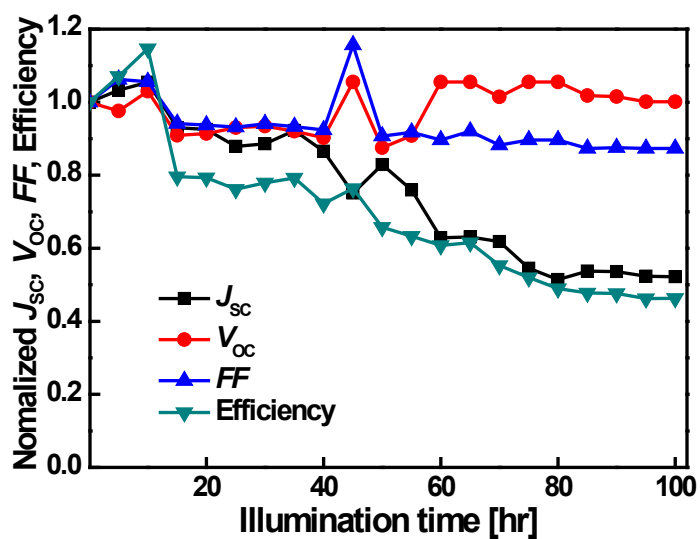

**Figure S5.** *a*-Si:H/[71]PCBM solar cell performance characteristics for illumination time.
